# Supplementary material for: Mitochondrial DNA Hypomethylation Is a Biomarker Associated with Induced Senescence in Human Fetal Heart Mesenchymal Stem Cells
Source: PubMed Central journal article supplement (PMC5397648; doi:10.1155/2017/1764549), 2017-04-06
Supplement: 1764549.f1.pdf [file 1764549.f1.pdf]

**Mitochondrial DNA hypomethylation is a biomarker associated with induced senescence in human fetal heart mesenchymal stem cells**

Dehai Yu<sup>1,2</sup>, Zhonghua Du<sup>1,2</sup>, Lingling Pian<sup>1,2</sup>, Tao Li<sup>2</sup>, Xue Wen<sup>1</sup>, Wei Li<sup>1</sup>, Su-Jeong Kim<sup>3</sup>, Jialin Xiao<sup>3</sup>, Pinchas Cohen<sup>3\*</sup>, Jiuwei Cui<sup>1\*</sup>, Andrew R. Hoffman<sup>2\*</sup>, Ji-Fan Hu<sup>1,2\*</sup>

<sup>1</sup> Stem Cell and Cancer Center, First Affiliated Hospital, Jilin University, Changchun, Jilin 130061, P.R. China

<sup>2</sup> Stanford University Medical School, Palo Alto Veterans Institute for Research, Palo Alto, CA 94304, USA

<sup>3</sup> Leonard Davis School of Gerontology, University of Southern California, Los Angeles, CA 90089, USA

## SUPPLEMENTARY FIGURES

### FIGURE LEGEND

**Figure S1.** The ECM pathway in senescent MSCs cultured from human fetal heart tissues (HMSCs). Total RNAs were isolated from HMSCs for RNA-Seq using a HiSeq4000 (Illumina). KEGG pathways were selected as significantly regulated if the corrected p-values were  $< 0.05$ . Genes highlighted with boxes represent up-regulated (red) and down-regulated (green) during replicative senescence based on normalized FPKM values for each gene.

**Figure S2.** The AKT pathway in senescent HMSCs. After RNA-Seq using a HiSeq4000 (Illumina), KEGG pathways were selected as significantly regulated if the corrected p-values were  $< 0.05$ . Genes highlighted with boxes represent up-regulated (red) and down-regulated (green) during replicative senescence based on normalized FPKM values for each gene.

**Figure S3. Mitochondrial DNA methylation of other CpG sites in senescent MSCs cultured from human fetal heart tissues (HMSCs, 8 CpG islands).**

- A.** Schematic diagram of the mitochondrial genes and the location of CpG islands.
- B.** Comparison of mtDNA methylation between the control and senescent HMSCs.  
Cellular senescence was induced by exposing HMSCs to 50  $\mu\text{M}$   $\text{H}_2\text{O}_2$  and 5% FBS in the medium, and mtDNA methylation was measured by combined

bisulfite restriction analysis (COBRA). PCR products from mtDNA of control and senescent HMSCs were digested by TaqI or HpyCH4IV (HPY) to distinguish the unmethylated and methylated DNAs, and were separated on 3% agarose gels. Only the data of CpG islands 3, 5-8 are presented here.

**Figure S4. Mitochondrial DNA methylation other CpG sites in senescent MSCs cultured from human fetal skin tissues (SMSCs, 8 CpG islands).**

- A.** Schematic diagram of the mitochondrial genes and the location of CpG islands.
- B.** Comparison of mtDNA methylation between the control and senescent SMSCs. Cellular senescence was induced by exposing SMSCs to 50  $\mu$ M H<sub>2</sub>O<sub>2</sub> and 5% FBS in the medium, and mtDNA methylation was measured by combined bisulfite restriction analysis (COBRA). PCR products from mtDNA of control and senescent HMSCs were digested by TaqI or HpyCH4IV (HPY) to distinguish the unmethylated and methylated DNAs, and were separated on 3% agarose gels. Only the data of CpG islands 3, 5-8 are presented here.

**Figure S5. Differential mtDNA methylation other CpG sites between the human neonatal and adult fibroblasts (8 CpG islands).**

- A.** Schematic diagram of the mitochondrial genes and the location of CpG islands.
- B.** Differential mtDNA methylation between neonatal and adult fibroblasts. mtDNA methylation was measured by combined bisulfite restriction analysis (COBRA). PCR products from mtDNA of neonatal and adult fibroblasts were digested by TaqI or HpyCH4IV (HPY) to distinguish the unmethylated and

methylated DNAs, and were separated on 3% agarose gels. Only the data of CpG islands 3, 5-8 are presented here.

## SUPPLEMENTARY TABLES

**Table S1. PCR oligonucleotide primers for CpG islands 1-11.**

| <b>CpG island</b> | <b>Oligo Name</b> | <b>Oligo sequence</b>          | <b>Product Size</b> |
|-------------------|-------------------|--------------------------------|---------------------|
| 1                 | JH2970            | ACGGAATAAGTTATTTTAGGGATAAT     | <b>224bp</b>        |
|                   | JH3046            | ACGAACCTTTAATAACGACTACACCA     |                     |
| 2                 | JH3048            | CGAATTAAACCAAAAAATTAATTAATAC   | <b>185bp</b>        |
|                   | JH2974            | AGGAGTTTAAATTTTTTTATTTTTTAGGAT |                     |
| 3                 | JH3049            | AACCTCTTTTTACCAACTCCGAAATA     | <b>147bp</b>        |
|                   | JH2976            | AATAGTT AAGTATTTTA ATTAATTGGT  |                     |
| 4                 | JH3050            | AAACCTACAAATAATAAAATATTTTCATA  | <b>180bp</b>        |
|                   | JH2978            | TTTATTTTTTAGGTTATATTTTTAGATTAA |                     |
| 5                 | JH3052            | GGTTTAATATTTTTTGTAGTTATAGGT    | <b>169bp</b>        |
|                   | JH2983            | ATCAAACCACATCTACAAAATACCAA     |                     |
| 6                 | JH3055            | ACTATTTATTATAAATCTCATAAATTAA   | <b>165bp</b>        |
|                   | JH2988            | AGGAATTATATTTTTTTTTGTTTATTAG   |                     |
| 7                 | JH3057            | GTTGTATTTTAATTATAAGAATATTAATG  | <b>169bp</b>        |
|                   | JH2993            | CCTATAATAATTTAAAAAATCAAACAA    |                     |
| 8                 | JH3058            | TATTAGATTTTTTAGGCGATTTAGATA    | <b>138bp</b>        |
|                   | JH2997            | AAACGCCTCCTAATTTATTAA          |                     |
| 9                 | JH2972            | TAATCGTAATGGTATTTTTAATGT TTAT  | <b>141bp</b>        |
|                   | JH3098            | AAAACCTCTTAATAAAAAATTTTTATAAC  |                     |
| 10                | JH3056            | TAGGTTAATTTTCGTTTTTTTTATTTTTAT | <b>124bp</b>        |
|                   | JH3099            | AAAATATTATTAATAATAAAAAATCCTAC  |                     |
| 11                | JH2994            | ATAGGATTATTTTTAGTTATGTAT       | <b>214bp</b>        |
|                   | JH2995            | TAATACCGATATTTCAAATTTCTAAA     |                     |

Down-regulation Up-regulation

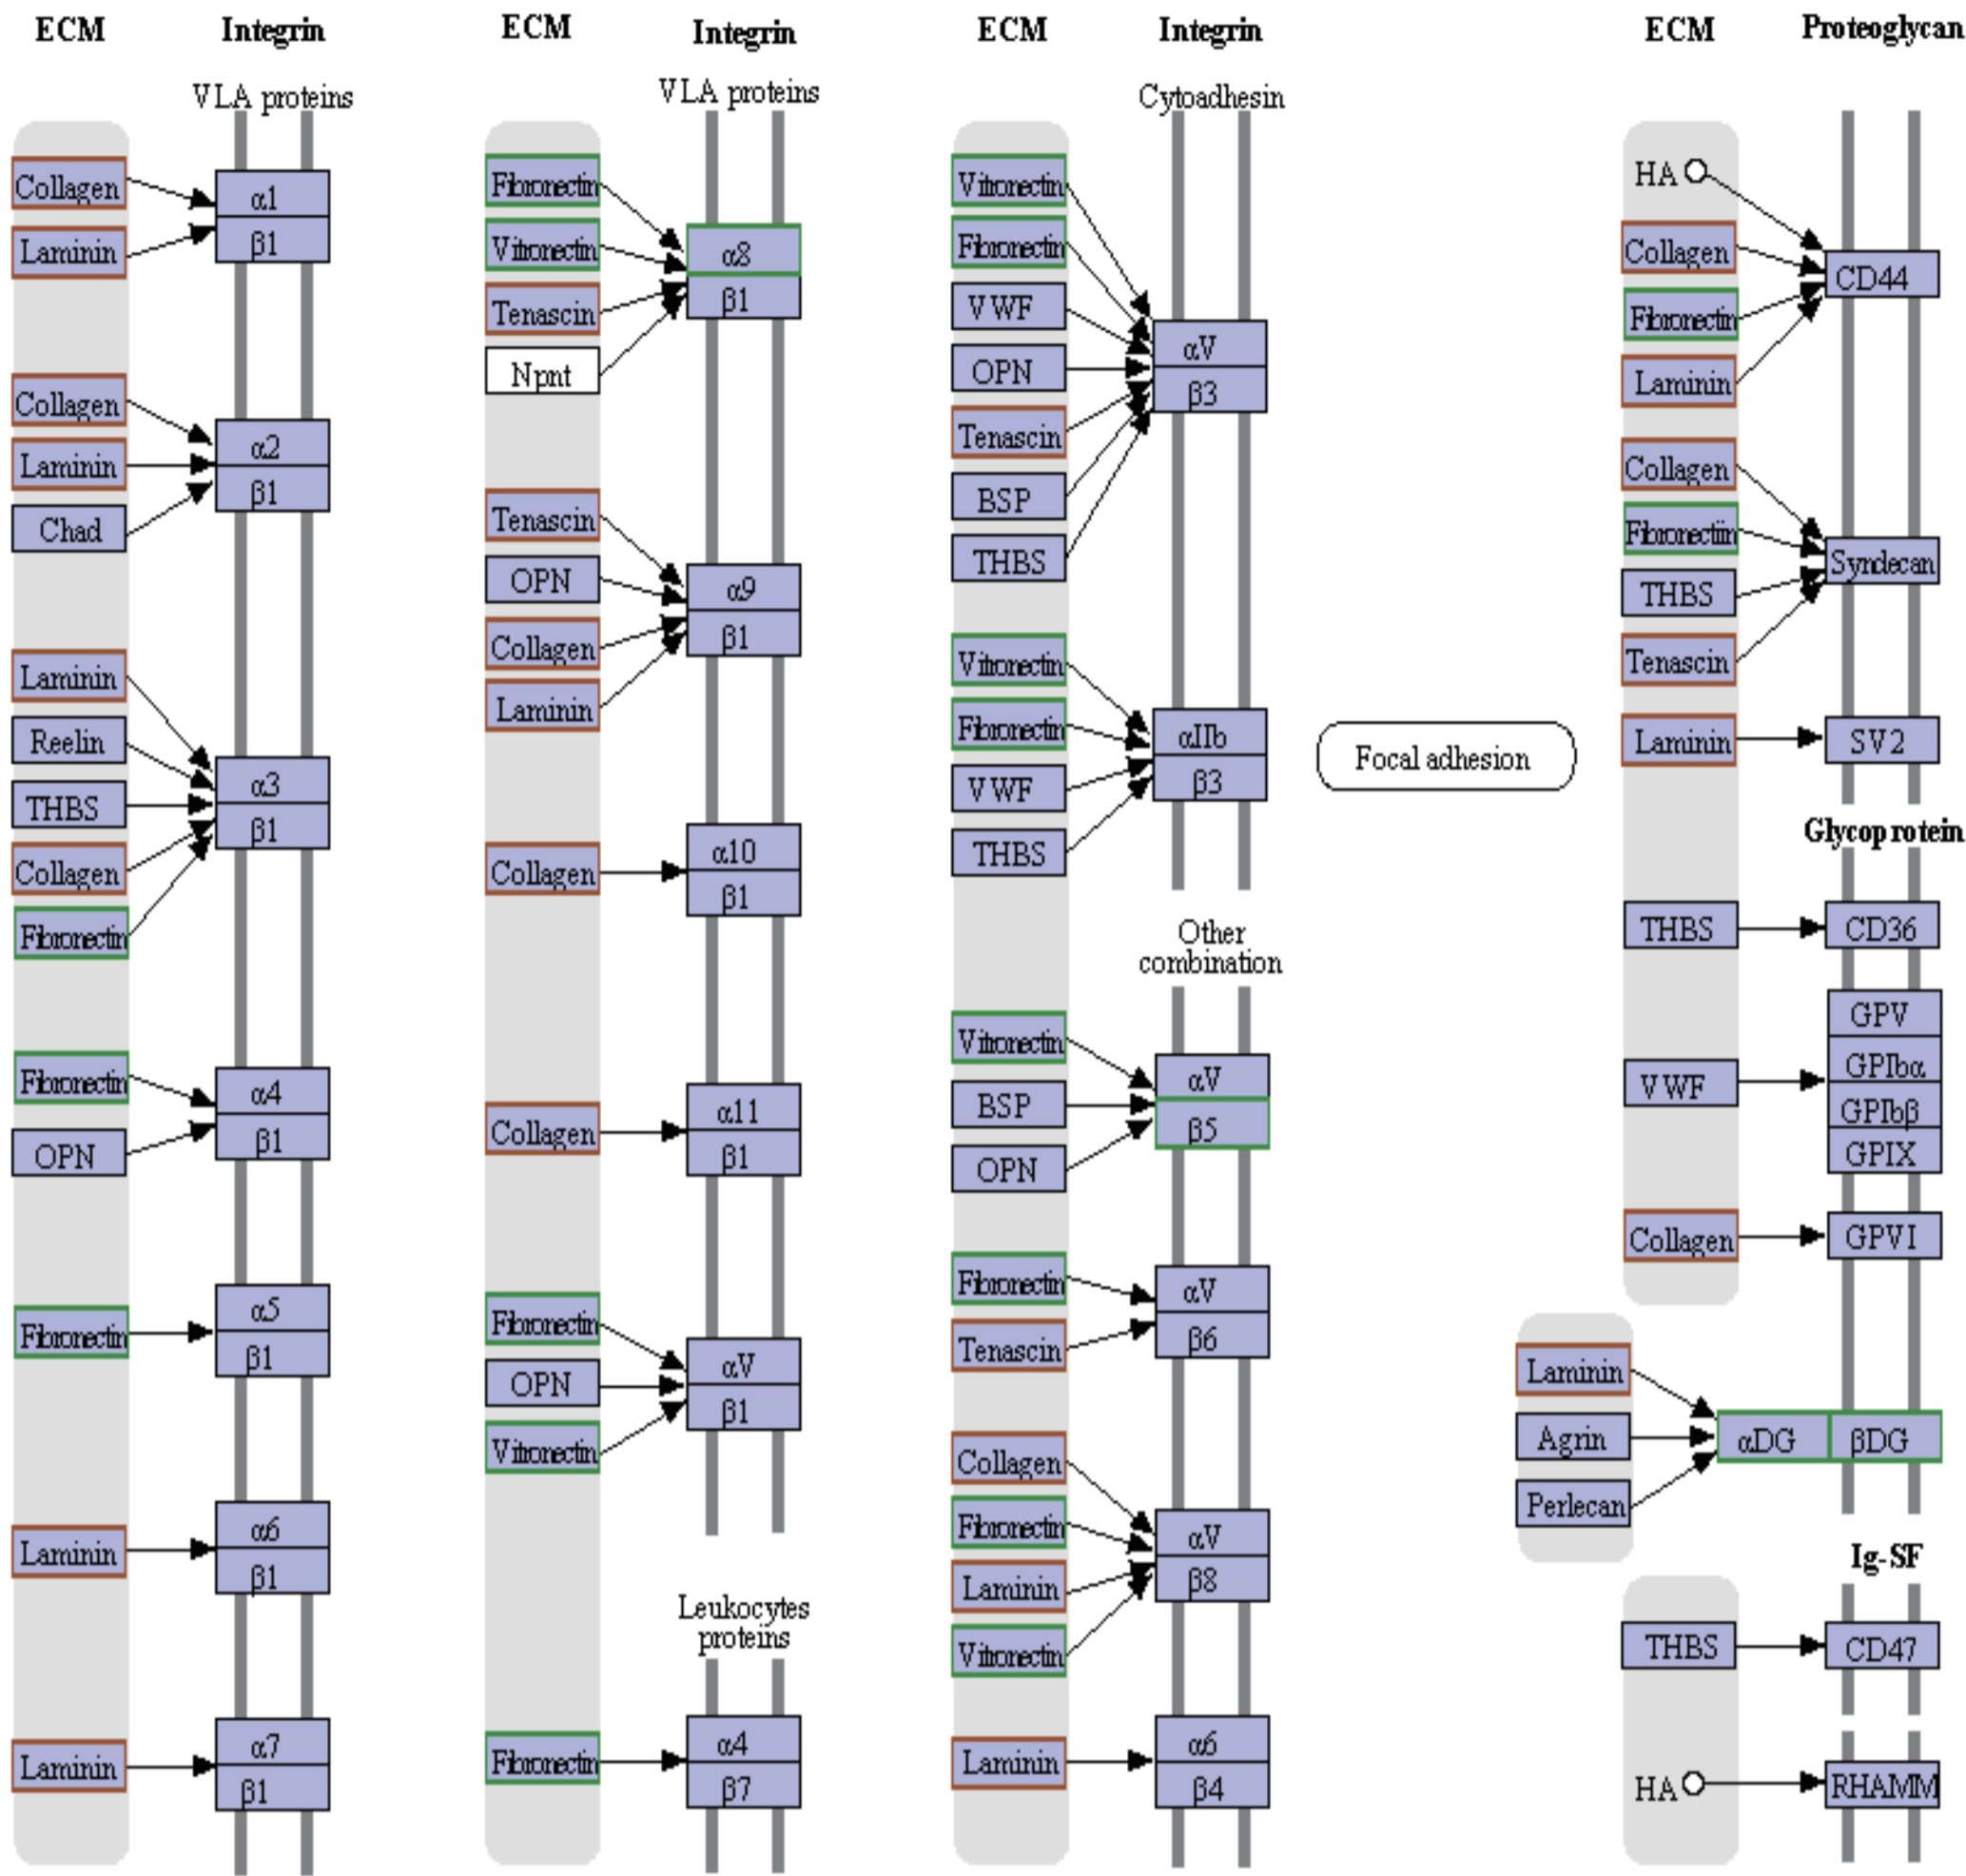

| Gene ID | logFC(AgMSC/HdMSC) | q-value<0.05 |
|---------|--------------------|--------------|
| FN1     | -15.8819477        | 1.61E-14     |
| ITGB5   | -8.79907284        | 0.000287829  |
| COL5A1  | -7.97665592        | 0.003505373  |
| VIN     | -6.06076155        | 2.08E-05     |
| ITGA8   | -5.80522286        | 3.52E-06     |
| TNXB    | -5.54790327        | 3.75E-06     |
| COL3A1  | -4.86197037        | 3.65E-05     |
| LAMA1   | -3.45255312        | 0.004010821  |
| LAMA5   | -3.12243094        | 0.010891277  |
| DAG1    | -3.09489957        | 0.0220609    |
| COL4A4  | -3.05444632        | 0.016974287  |
| LAMA4   | 2.75972297         | 0.030525022  |
| COL4A5  | 3.617758           | 0.002506254  |
| COL5A3  | 3.66121947         | 0.002134789  |
| LAMA4   | 3.66914049         | 0.002016458  |
| COL6A3  | 5.98034444         | 1.77E-06     |
| TNC     | 7.4373014          | 1.48E-08     |

Figure S1. Activation of the ECM pathway in senescent HMSCs

Down-regulation (green oval) Up-regulation (red oval)

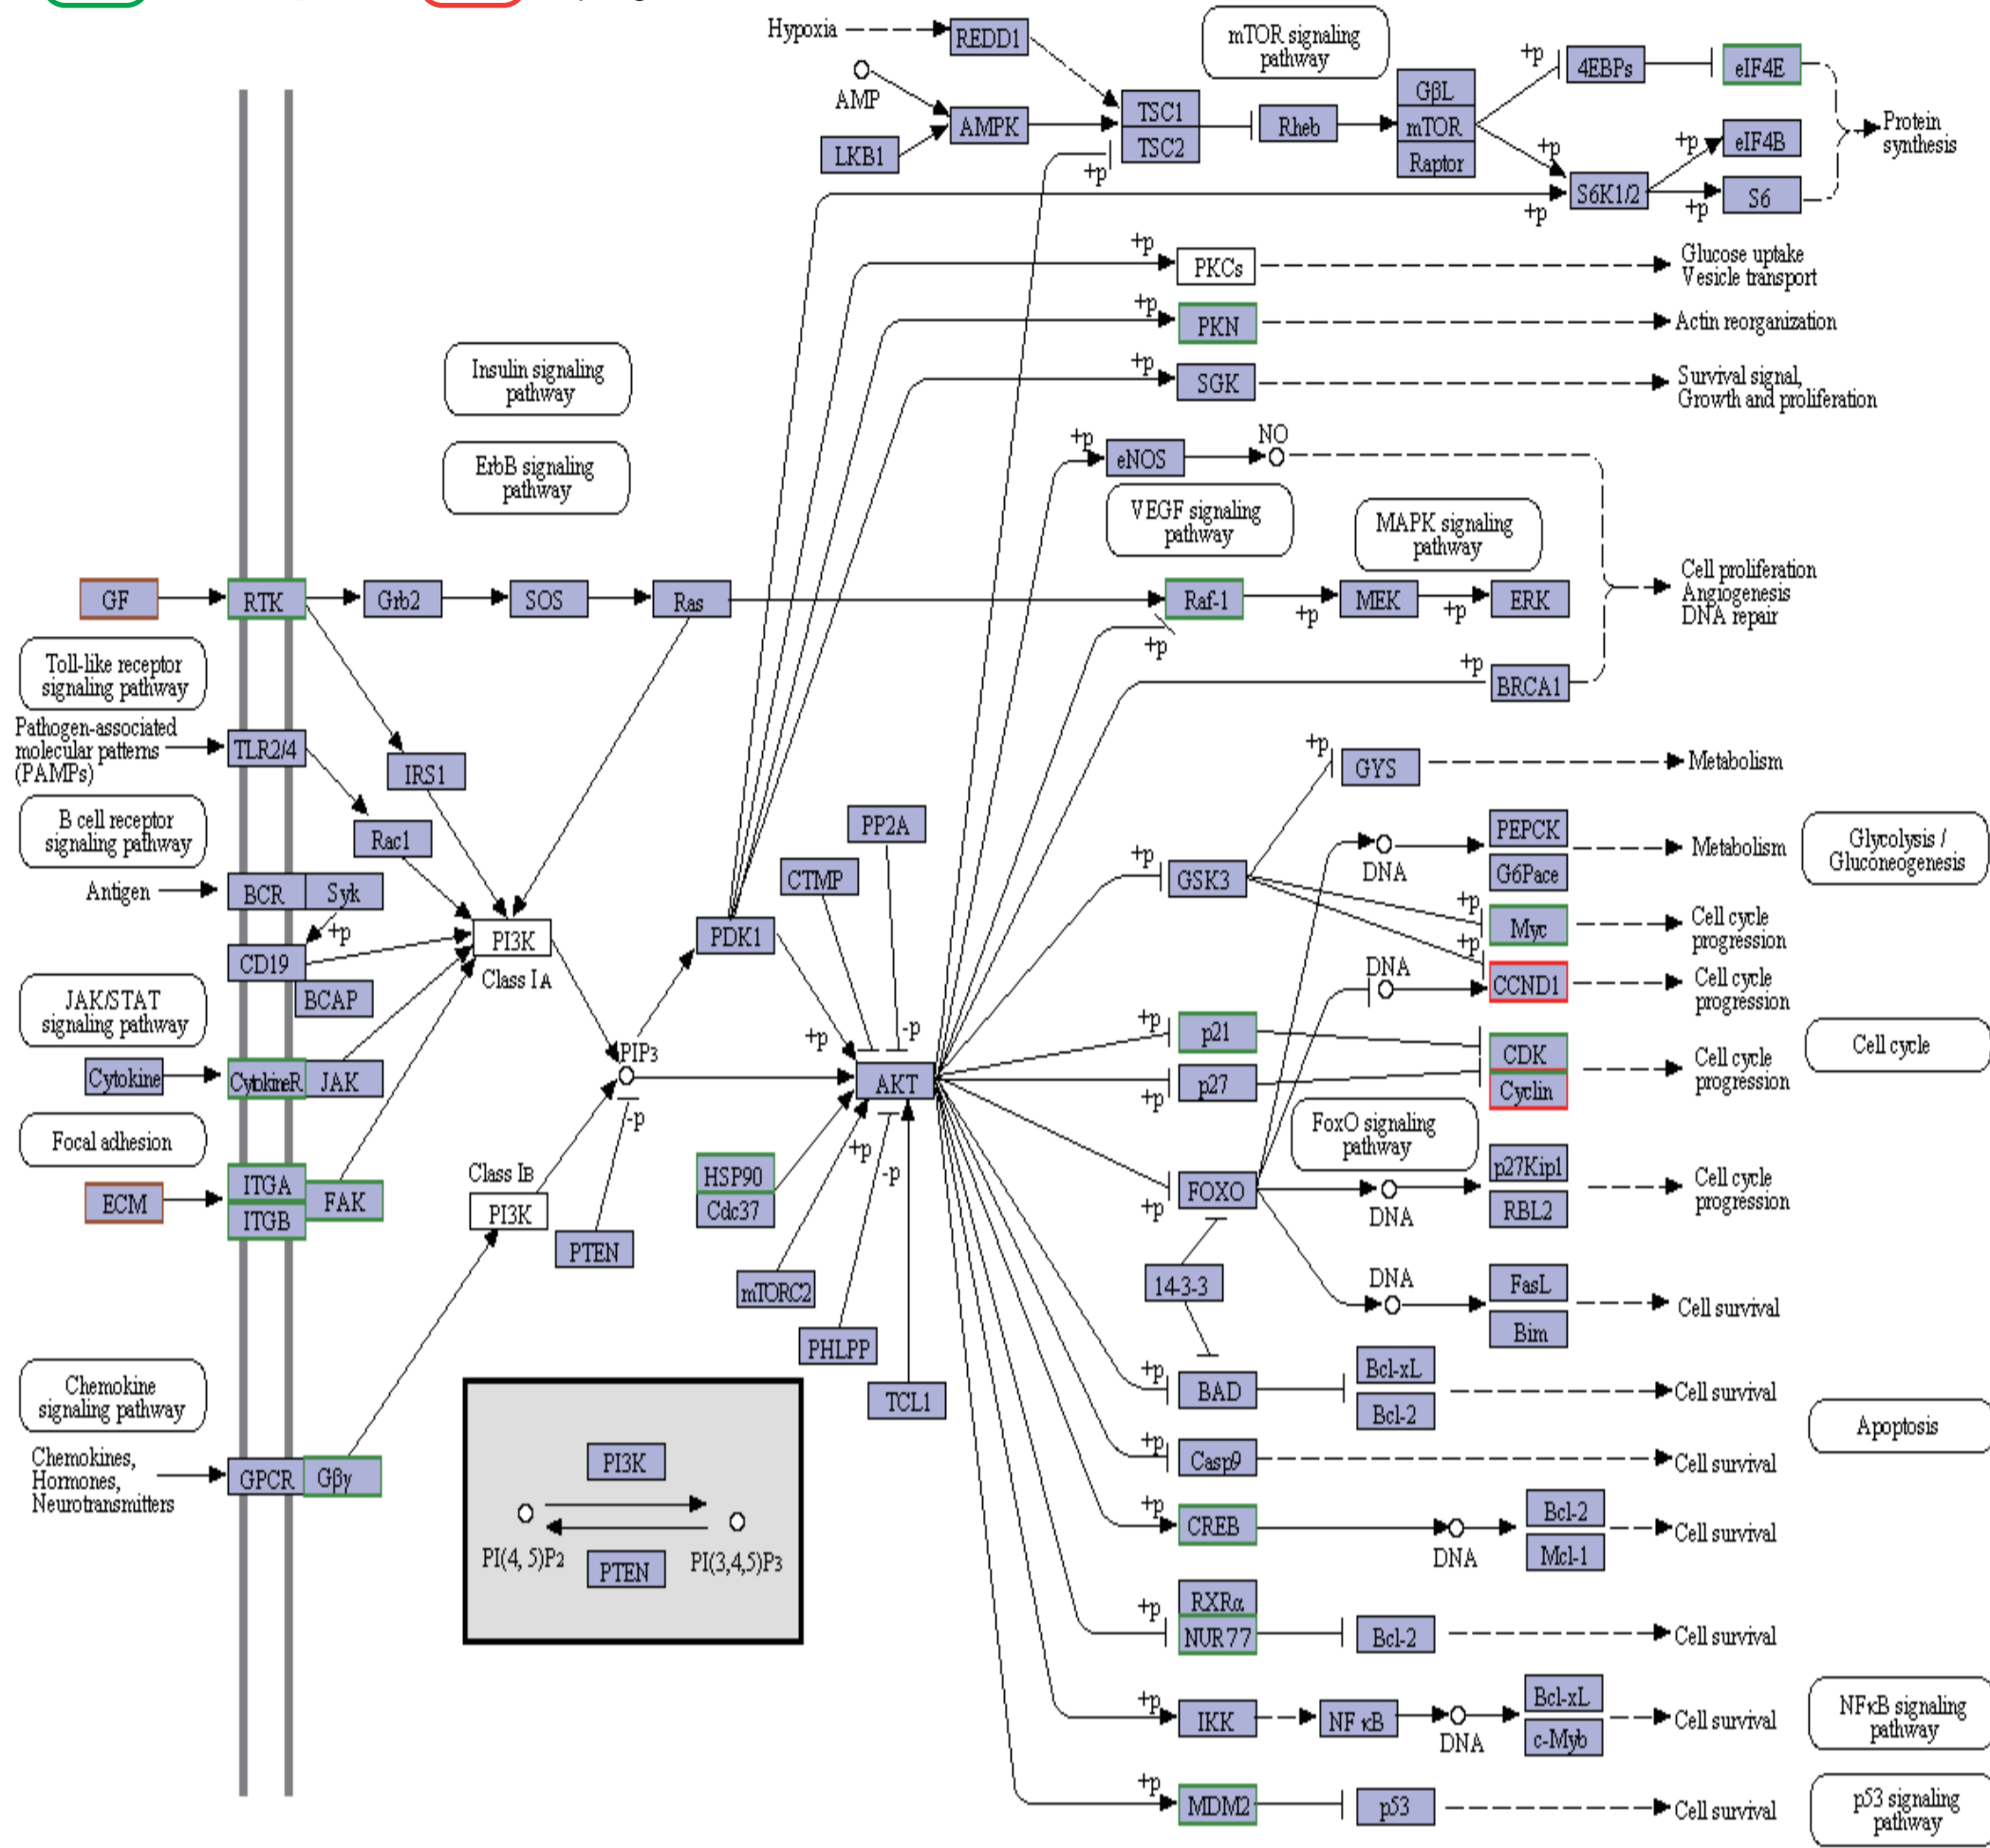

| Gene ID  | logFC(Ag MSC/HdM SC) | q-value(<0.05) |
|----------|----------------------|----------------|
| ANGPT1   | 4.719789             | 6.98E-05       |
| ATF2     | -8.84478             | 0.00023981     |
| CCND1    | 3.394681             | 0.010090873    |
| CDK4     | -3.93327             | 0.003928549    |
| CDKN1A   | -9.94113             | 6.15E-06       |
| COL3A1   | -4.86197             | 3.65E-05       |
| COL4A4   | -3.05445             | 0.016974287    |
| COL4A5   | 3.617758             | 0.002506254    |
| COL5A1   | -7.97666             | 0.003505373    |
| COL5A3   | 3.661219             | 0.002134789    |
| COL6A3   | 5.980344             | 1.77E-06       |
| EIF4E    | -8.57335             | 0.000568414    |
| FGF7     | 2.841623             | 0.026383721    |
| FGFR2    | -10.3266             | 1.74E-06       |
| FN1      | -15.8819             | 1.61E-14       |
| GHR      | -3.99299             | 0.00220827     |
| GNB2     | -9.58498             | 2.01E-05       |
| HSP90AB1 | -9.4875              | 2.85E-05       |
| ITGA8    | -5.80522             | 3.52E-06       |
| ITGB5    | -8.79907             | 0.000287829    |
| LAMA1    | -3.45255             | 0.004010821    |
| LAMA4    | 3.66914              | 0.002016458    |
| LAMA5    | -3.12243             | 0.010891277    |
| MDM2     | -9.36738             | 4.18E-05       |
| MYC      | -11.7124             | 1.98E-08       |
| NGF      | -5.04044             | 0.004745608    |
| NR4A1    | -8.23874             | 0.001497132    |
| PKN1     | -11.1184             | 1.19E-07       |
| PTK2     | -2.96042             | 0.029835517    |
| RAF1     | -3.16464             | 0.025945288    |
| TNC      | 7.48518              | 8.77E-09       |
| TNXB     | -5.5479              | 3.75E-06       |
| VEGFA    | -11.3891             | 5.43E-08       |
| VIN      | -6.06076             | 2.08E-05       |

Figure S2. Activation of the AKT pathway in senescent HMSCs

## A. mtDNA CpG islands

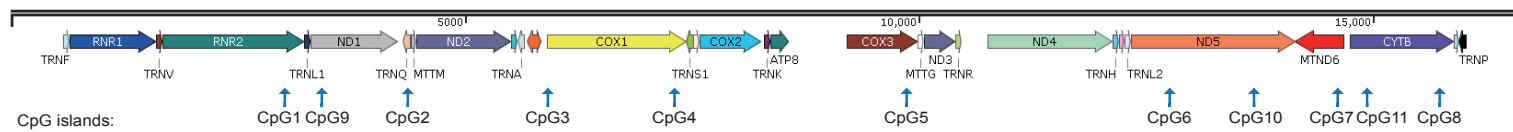

## B. mtDNA methylation in HMSCs

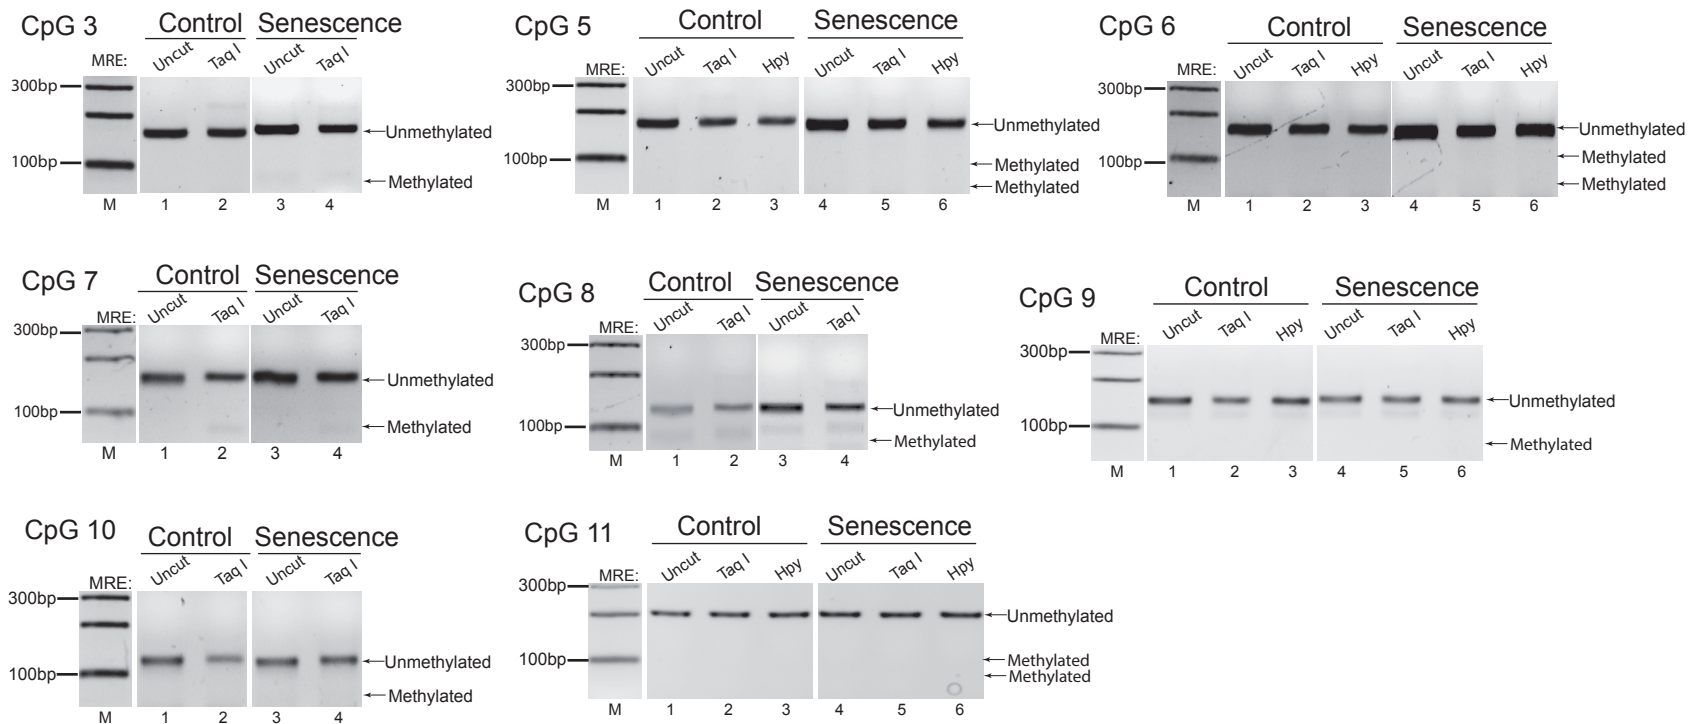

Figure S3. mtDNA methylation in senescent HMSCs



## A. mtDNA CpG islands

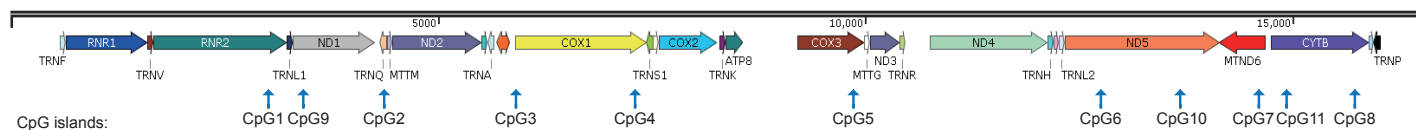

## B. mtDNA methylation in HMSCs

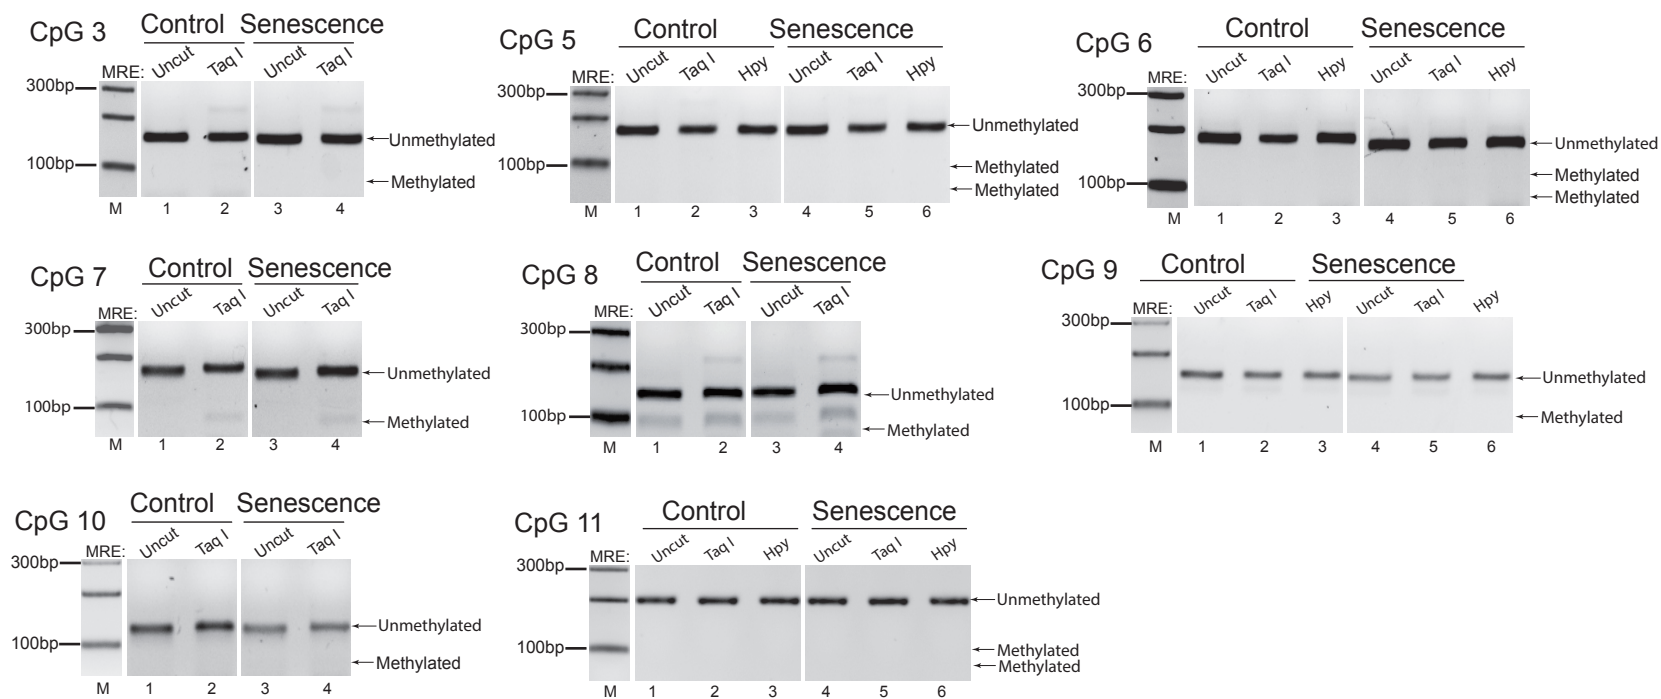

Figure S4. mtDNA methylation in senescent SMSCs

## A. mtDNA CpG islands

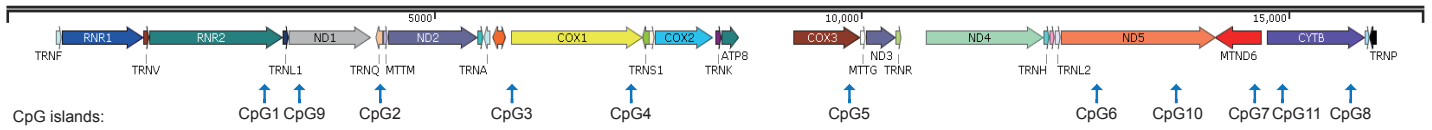

## B. mtDNA methylation in HMSCs

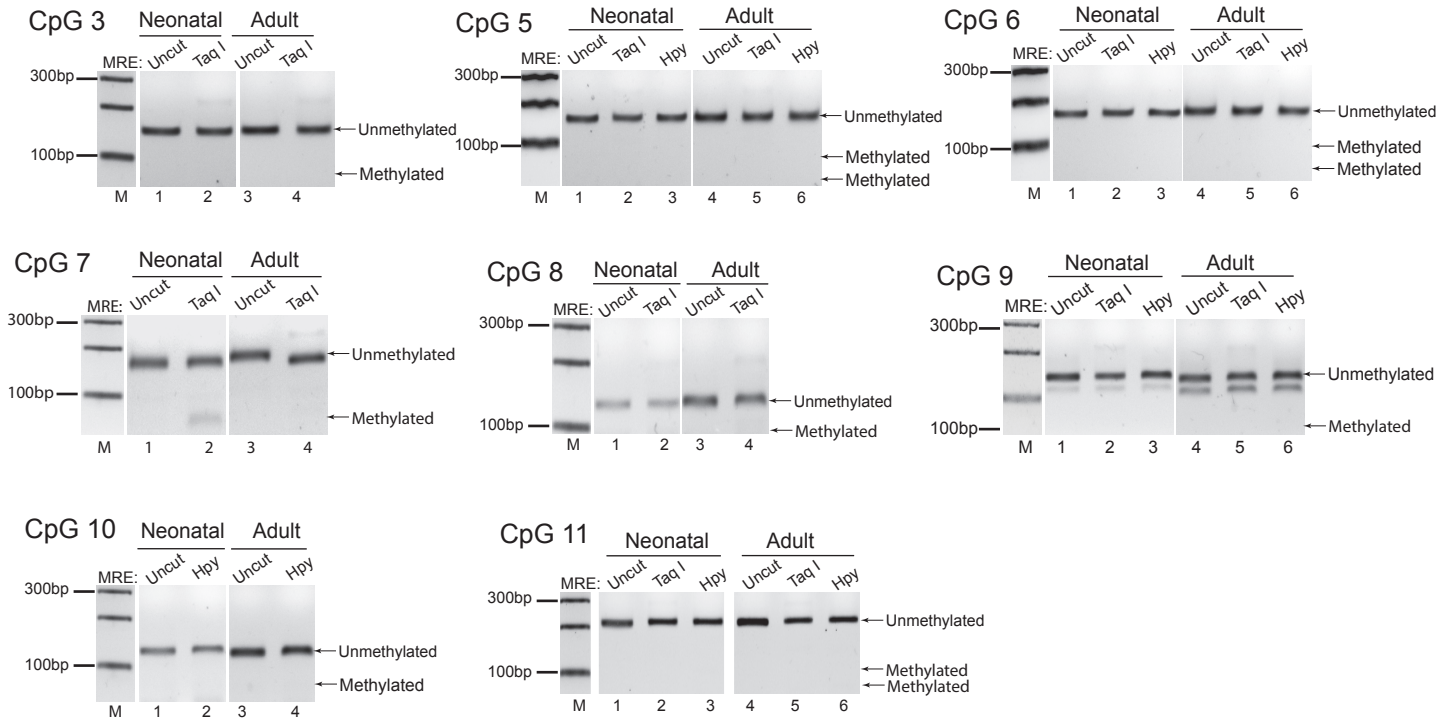

Figure S5. mtDNA methylation in neonatal and adult fibroblasts
